# Supplementary material
Source: MDPI journal article supplement (https://www.mdpi.com/2311-7524/9/3/316)
Supplement: s1 [file s1]

**Table S1.** List of the 49 accessions collected and their place of origin in the Andalusia region (Spain).

| <b>Accession code</b> | <b>Origin</b>     | <b>Province</b> |
|-----------------------|-------------------|-----------------|
| Alb-1                 | Alboloduy         | Almería         |
| Alb-2                 | Alboloduy         | Almería         |
| Can-1                 | Canjayar          | Almería         |
| Chu-1                 | Chucena           | Huelva          |
| Chu-2                 | Chucena           | Huelva          |
| Chu-3                 | Chucena           | Huelva          |
| Chu-4                 | Chucena           | Huelva          |
| Chu-5                 | Chucena           | Huelva          |
| Com-2                 | Cómpeta           | Málaga          |
| Com-3                 | Cómpeta           | Málaga          |
| Com-4                 | Cómpeta           | Málaga          |
| Ins-1                 | Instinción        | Almería         |
| Ins-2                 | Instinción        | Almería         |
| Ins-3                 | Instinción        | Almería         |
| Ins-4                 | Instinción        | Almería         |
| Lau-10                | Laujar de Andarax | Almería         |
| Lau-11                | Laujar de Andarax | Almería         |
| Lau-2                 | Laujar de Andarax | Almería         |
| Lau-3                 | Laujar de Andarax | Almería         |
| Lau-4                 | Laujar de Andarax | Almería         |
| Lau-5                 | Laujar de Andarax | Almería         |
| Lau-6                 | Laujar de Andarax | Almería         |
| Lau-7                 | Laujar de Andarax | Almería         |
| Lau-8                 | Laujar de Andarax | Almería         |
| Lau-9                 | Laujar de Andarax | Almería         |
| Lau-1                 | Laujar de Andarax | Almería         |
| Lau-12                | Laujar de Andarax | Almería         |
| Lau-13                | Laujar de Andarax | Almería         |
| Lau-14                | Laujar de Andarax | Almería         |
| Lau-15                | Laujar de Andarax | Almería         |
| Lau-16                | Laujar de Andarax | Almería         |
| Lau-17                | Laujar de Andarax | Almería         |
| Lau-18                | Laujar de Andarax | Almería         |
| Man-1                 | Manzanilla        | Huelva          |
| Man-2                 | Manzanilla        | Huelva          |
| Man-3                 | Manzanilla        | Huelva          |
| Man-4                 | Manzanilla        | Huelva          |
| Man-5                 | Manzanilla        | Huelva          |
| Pla-1                 | Planellas         | Almería         |
| Pla-2                 | Planellas         | Almería         |
| Ron-1                 | Ronda             | Málaga          |

|        |                   |         |
|--------|-------------------|---------|
| Ron-2  | Ronda             | Málaga  |
| Ron-3  | Ronda             | Málaga  |
| Ron-4  | Ronda             | Málaga  |
| Ron-5  | Ronda             | Málaga  |
| Ron-6  | Ronda             | Málaga  |
| Rot-1  | Rota              | Cádiz   |
| Rot-2  | Rota              | Cádiz   |
| Lau-19 | Laujar de Andarax | Almería |
